# Supplementary material
Source: publisher figshare collection journal article supplement (https://gsajournals.figshare.com/articles/dataset/_/16869645)
Supplement: Supplementary file 1 [file 1]

**(Supplemental Figures)**

**Identification of Condition-Specific Biomarker Systems in  
Uterine Cancer**

**Allison R. Hickman<sup>1</sup>, Yuqing Hang<sup>1</sup>, Rini Pauly<sup>2</sup>, and Frank A. Feltus<sup>1,2,3</sup>**

<sup>1</sup>Clemson University Department of Genetics & Biochemistry 29634 USA

<sup>2</sup>Clemson University Biomedical Data Science and Informatics Program 29634 USA

<sup>3</sup>Clemson University Center for Human Genetics 29634 USA

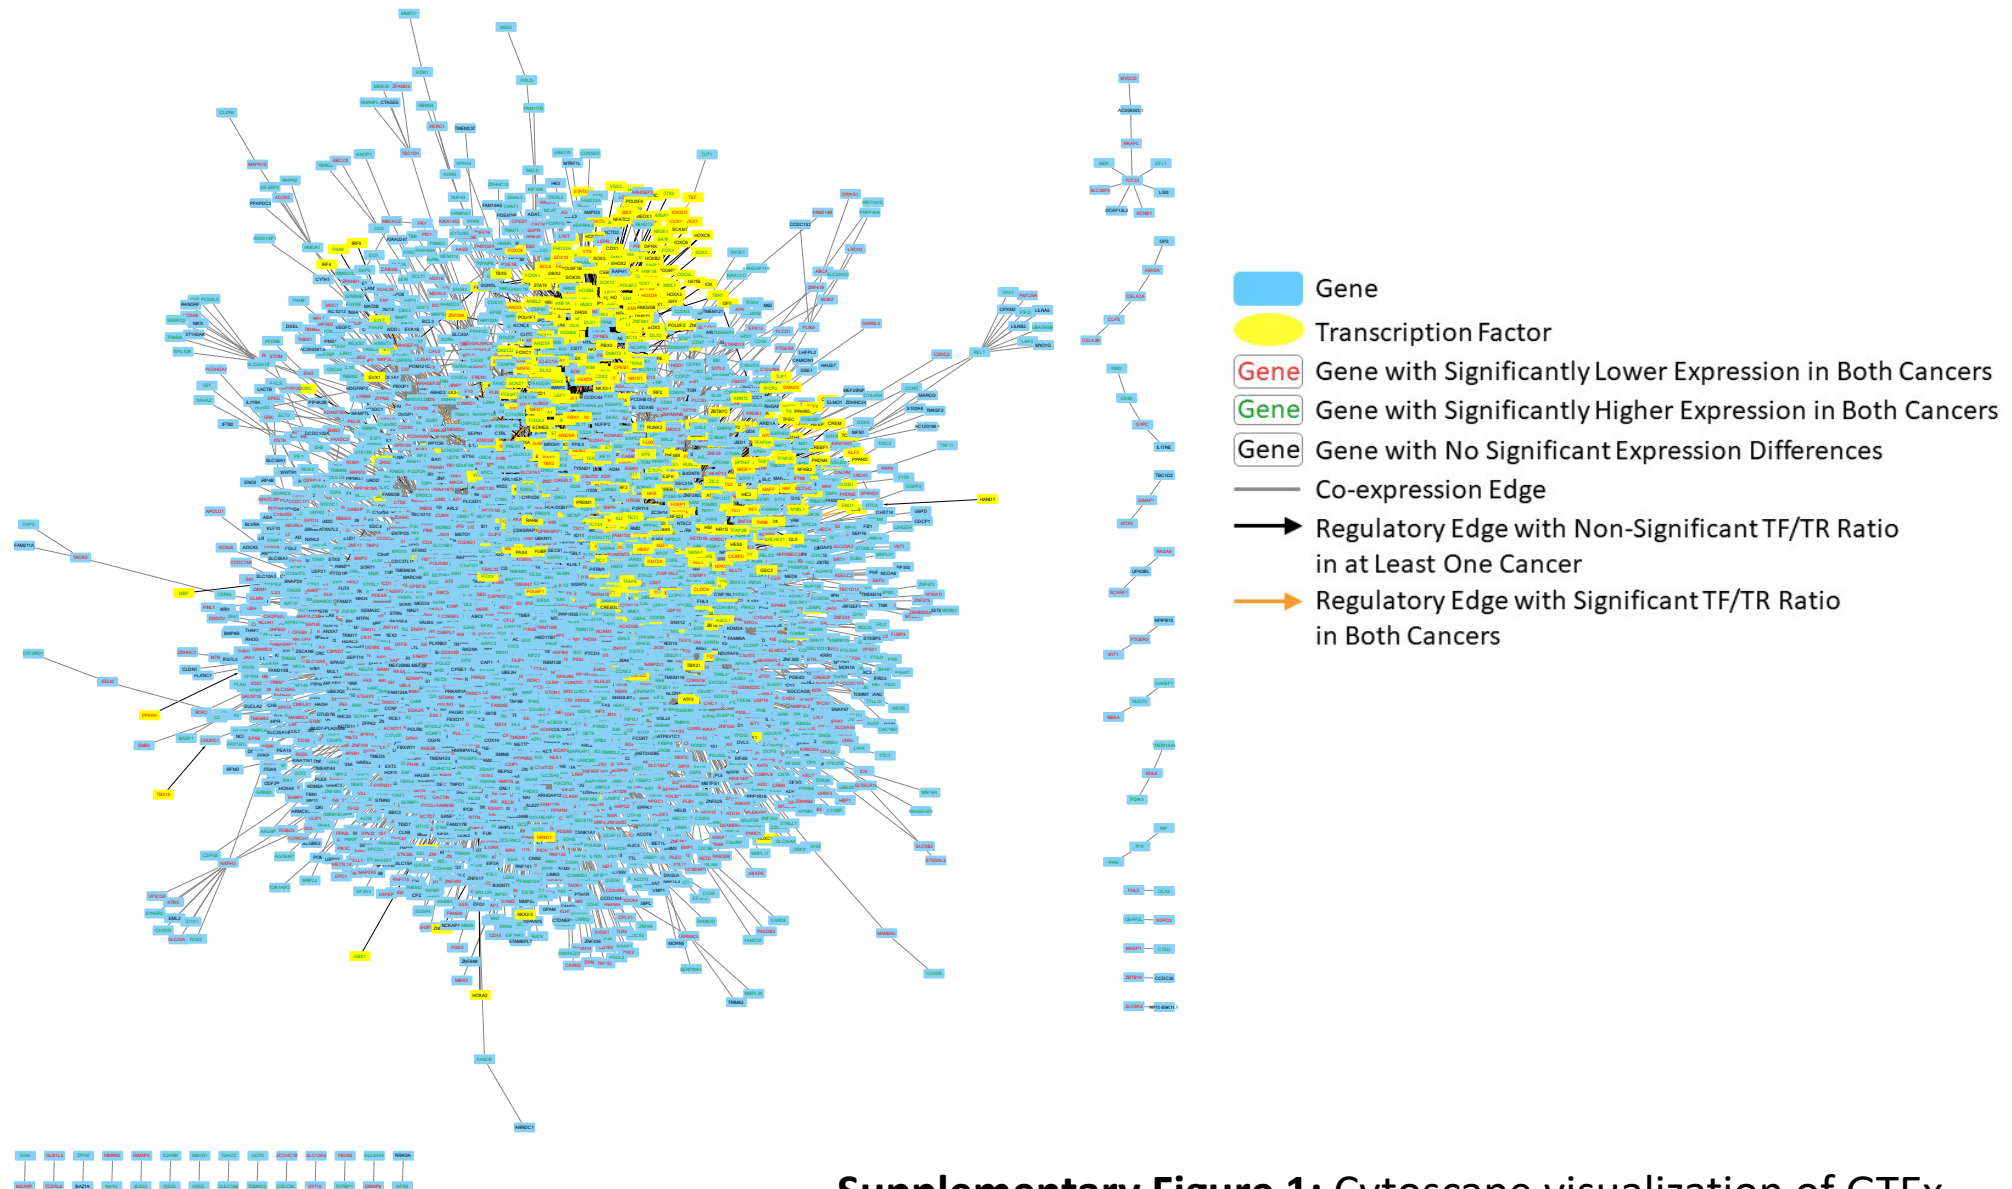

**Supplementary Figure 1:** Cytoscape visualization of GTEx-specific network with co-expression and regulatory edges.

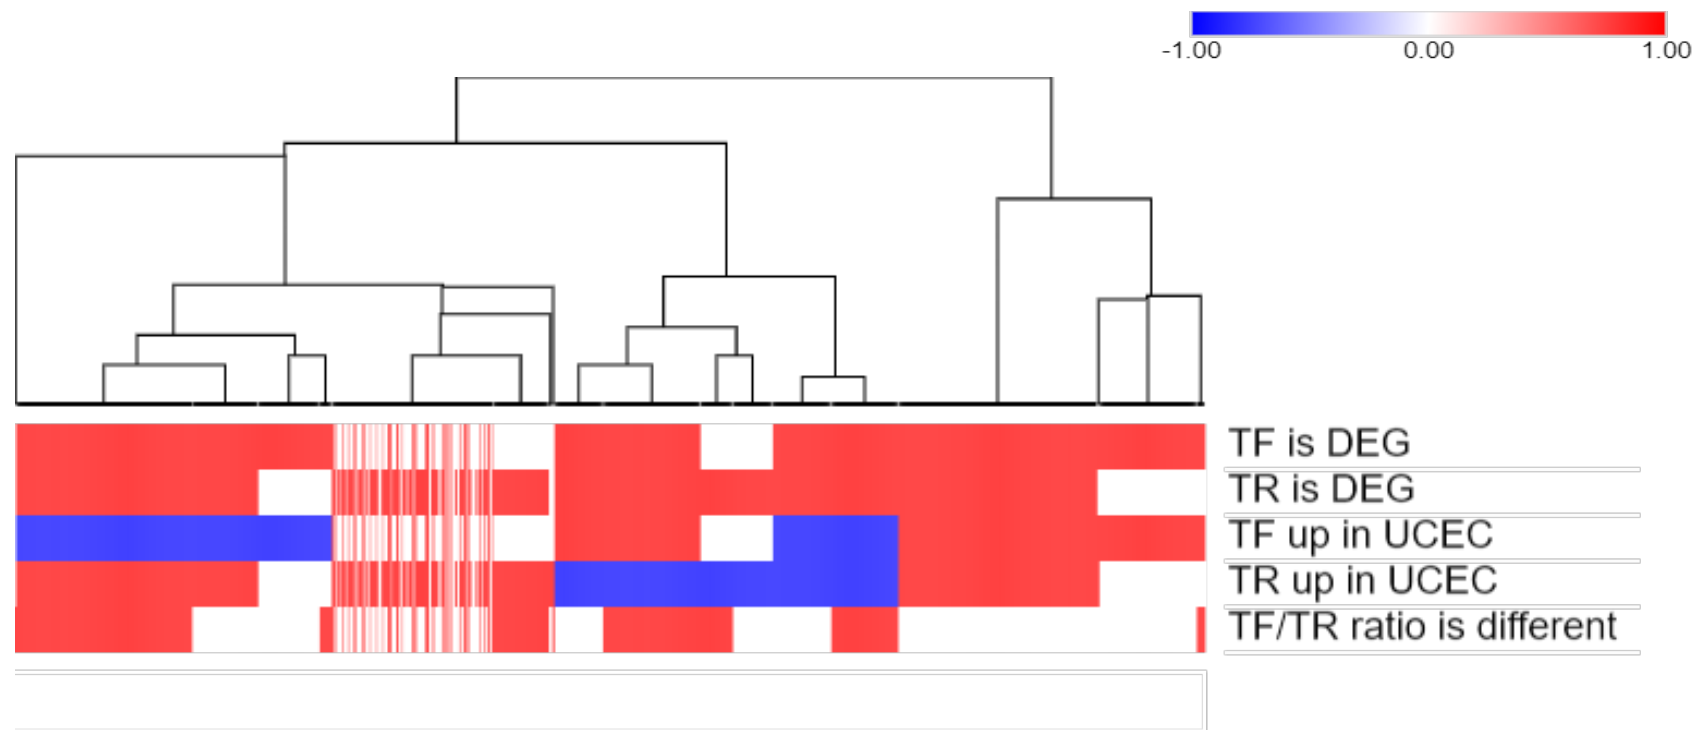

**Supplementary Figure 2: Heatmap of UCEC Regulatory Edges.** First two rows represent if the transcription factor and target gene are differentially expressed genes; red denoting it is, and white represents it is not. If the transcription factor or target gene is differentially expressed, it's expression in UCEC is represented in the following two rows. Red represents increased expression in cancer, blue represents decreased expression in cancer, and white means the gene is not differentially expressed. The bottom row details regulatory edges that have a significantly different transcription factor to target gene ratio between UCEC and normal tissue. Red represents a significant difference and white represents no significant difference.
