# Supplementary material
Source: publisher figshare collection journal article supplement (https://gsajournals.figshare.com/articles/dataset/_/16869645)
Supplement: Supplementary file 1 [file 1]

**Supplemental Data Files**

Supplemental Figure 1: Cytoscape visualization of GTEx-specific network with co-expression and regulatory edges

Supplemental Figure 2: Heatmap of UCEC regulatory edges

Supplemental Table 1. Gene Co-expression Networks with DEG Annotations

Supplemental Table 2. Differential Expression Analysis Results Comparing UCEC and GTEx

Supplemental Table 3. Differential Expression Analysis Results Comparing UCS and GTEx

Supplemental Table 4. Cancer-Specific Gene Regulatory Networks

Supplemental Table 5. GTEx Gene Regulatory Network

Supplemental Table 6. GDC Mutation Rates of UCEC Triangle Genes and Transcription Factors

Supplemental Table 7. Functional Enrichment Results for Differentially Expressed Genes in Each Cancer-Specific Gene Expression Network

Supplemental Data 1: Cytoscape file with merged csGCN-GRNs.
